# Supplementary material for: Insights into the rheology of cohesive granular media
Source: PubMed Central journal article supplement — Proc Natl Acad Sci U S A. 2020 Apr 2;117(15):8366–73. doi: 10.1073/pnas.1921778117 (PMC7165423; doi:10.1073/pnas.1921778117), 2020-04-02
Supplement: pnas.1921778117.sapp.pdf [file pnas.1921778117.sapp.pdf]

1

2 **Supplementary Information for**  
3 **New insights into the rheology of cohesive granular media**  
4 **Sandip Mandal, Maxime Nicolas, and Olivier Pouliquen**

5 **Olivier Pouliquen**  
6 **E-mail: [olivier.pouliquen@univ-amu.fr](mailto:olivier.pouliquen@univ-amu.fr)**

7 **This PDF file includes:**

8 Figs. S1 to S8

9 **SI 1: Hertzian-DMT model.** We use a second (non-hysteretic) contact force model called the Hertzian-DMT model, where the  
10 viscoelastic contact forces are computed using the Hertzian spring-dashpot model and the adhesive force, using a constant  
11 adhesion  $N_c$ . Fig. S1 shows the variation of the normal elastic force  $N_{ij}^{el}$  (green), adhesive force  $N_{ij}^{ad}$  (blue), and the total of the  
12 two  $N_{ij}^{tot}$  (red) normalized by  $N_c$  with the normalized normal overlap  $(\delta/\delta_{eq})$ . Using this model, the dynamics of two identical  
13 ( $m_{eff} = m/2$ ) contacting particles in the absence of any external forces is given by the following equation of a non-linear  
14 damped oscillator:

$$\frac{m}{2} \frac{d^2\delta}{dt^2} = -\sqrt{\delta} \left( k_n \delta + \frac{m}{2} \gamma_n \frac{d\delta}{dt} \right) + N_c. \quad [1]$$

16 In the static limit, the left-hand side and the second term on the right-hand side in Eq. 1 are zero, and the balance between the  
17 adhesive force and the elastic force (Eq. 1) then yields an equilibrium overlap  $\delta_{eq} = (N_c/k_n)^{2/3}$ . The quality factor of the  
18 oscillator is estimated after linearizing the equation around  $\delta_{eq}$  as  $Q = \sqrt{3}k_n^{2/3}/(\gamma_n m^{1/2} N_c^{1/6})$ .

19 **SI 2: Hysteretic Hookean-DMT model.** This model, where the particles experience the adhesive force only while detaching,  
20 is quite similar to a capillary bridge model but without any finite distance for the detachment. The model is sketched in  
21 Fig. S2. The initial loading of a contact continues along the path  $ABCDE$  on the green loading branch of slope  $k_n$  before  
22 reaching a maximum overlap  $\delta_{max}$ .  $\delta_{max}$  is saved as a history variable before unloading happens along the path  $EF$  on the  
23 blue unloading/reloading branch of slope  $k'_n$ . Reloading at this moment first occurs along the same branch following  $FE$ ,  
24 until the previous maximum overlap (or load) is reached, and reloading then continues along the path  $EH$  on the loading  
25 branch; the value of  $\delta_{max}$  is updated when the next unloading occurs. Unloading otherwise continues along the path  $CFG$   
26 before reaching a minimum overlap  $\delta_{min} = \delta_{max} - N_c/(k'_n - k_n)$ . Unloading further leads to the red adhesive branch, where  
27 the grains experience the adhesion along with the repulsion. Unloading continues along the path  $GI$ . The value of  $\delta_{min}$  is  
28 also saved before reloading happens again on  $IJD$  path on the unloading/reloading branch (there are an infinite number of  
29 possible unloading/reloading branches based on the initial unloading point). Reloading then continues on the loading branch  
30 for  $\delta > \delta_{max}$ , with  $\delta_{max} = \delta_{min} + N_c/(k'_n - k_n)$ . Unloading along the adhesive branch continues again when  $\delta < \delta_{min}$ . The  
31 contact is lost finally, and all the history is erased subsequently. The hysteretic force on the three branches is given as

$$\mathbf{N}_{ij}^{hys} = \begin{cases} -k_n \delta, & -k'_n(\delta - \delta_{eq}) \geq -k_n \delta \\ -k'_n(\delta - \delta_{eq}), & -k_n \delta > -k'_n(\delta - \delta_{eq}) > -k_n \delta + N_c \\ -k_n \delta + N_c, & -k_n \delta + N_c \geq -k'_n(\delta - \delta_{eq}), \end{cases} \quad [2]$$

33 where  $\delta_{eq} = (1 - k_n/k'_n)\delta_{max}$  on the way of unloading and  $\delta_{eq} = (1 - k_n/k'_n)\delta_{min} + N_c/k'_n$  on the way of reloading. The model  
34 is significantly different from the two non-hysteretic models. Firstly, the minimum pull-off force is load-dependent and is  
35 less than  $N_c$  if unloading happens below a maximum overlap  $\delta_{max} = N_c/(k'_n - k_n)$  corresponding to point  $C$ . Secondly, the  
36 dissipation can not be quantified through  $Q$  only—the ratio  $k'_n/k_n$  also plays a role. Therefore, one needs to be cautious about  
37 the interpretation of the effects of inter-particle adhesion and material parameters on the flow profiles in an inhomogeneous  
38 system like an inclined plane.

39 **SI 3: Coarse-graining.** The flow profiles are measured at steady-state in bins of cross-section  $20 \times 20$  and height 1 and are  
40 averaged over five sets with each over a time window of 50. The stress tensor in a bin of volume  $V$  is computed from

$$\boldsymbol{\sigma} = \frac{1}{V} \sum_{c=1}^{n_c} \mathbf{F}_{ij} \mathbf{x}_{ij} + \frac{1}{V} \sum_{p=1}^{n_p} m_p (\mathbf{c}_p - \mathbf{v})(\mathbf{c}_p - \mathbf{v}), \quad [3]$$

42 where  $n_c$  and  $n_p$  are the total numbers of inter-particle contacts and particles in the bin, and  $\mathbf{v}$  is the mean velocity of the  
43 particles in the bin.

44 **SI 4: Finding  $a$  and  $b$  for estimating the ‘effective’ adhesion for the Hookean-JKR model.** Fig. S3 shows a contour plot, which  
45 depicts the variation of the combined  $R^2$  ( $=R_{v^s}^2 + R_{h_c}^2$ ) with  $a$  and  $b$ , obtained while fitting the power laws to the collapsed  
46 data in  $v^s$  vs.  $N_c^{eff}$  and  $h_c$  vs.  $N_c^{eff}$  plots. The maximum in  $R^2$  is noted for  $a = 1/2$  and  $b = 1/4$ .

47 **SI 5: Collapses of the velocity, volume fraction, and r.m.s. velocity profiles for the Hookean-JKR model.** Fig. S4 shows collapses  
48 of the velocity ( $v_x(z)$ ), volume fraction ( $\phi(z)$ ), and r.m.s. velocity ( $u(z)$ ) profiles for nearly the same value of  $N_c^{eff}$  in two  
49 different cases.

50 **SI 6: A scaling for the dynamic ‘effective’ adhesion for the Hertzian-DMT model.** We follow the same approach for determining  
51 the dynamic ‘effective’ adhesion for the Hertzian-DMT model, as done for the Hookean-JKR model. We obtain  $a = 1/3$  and  
52  $b = 3/4$  in this case, which yield

$$N_c^{eff} = N_c \left[ \left( \frac{N_c}{k_n d^{3/2}} \right)^{1/3} \frac{1}{Q^{3/4}} \right]. \quad [4]$$

54 We finally obtain two well-defined master curves  $v^s(N_c^{eff})$  and  $h_c(N_c^{eff})$  (Fig. S5) for all the simulations done for various ( $N_c$ ,  
55  $k_n$ ,  $Q$ ) at  $29^\circ$ .

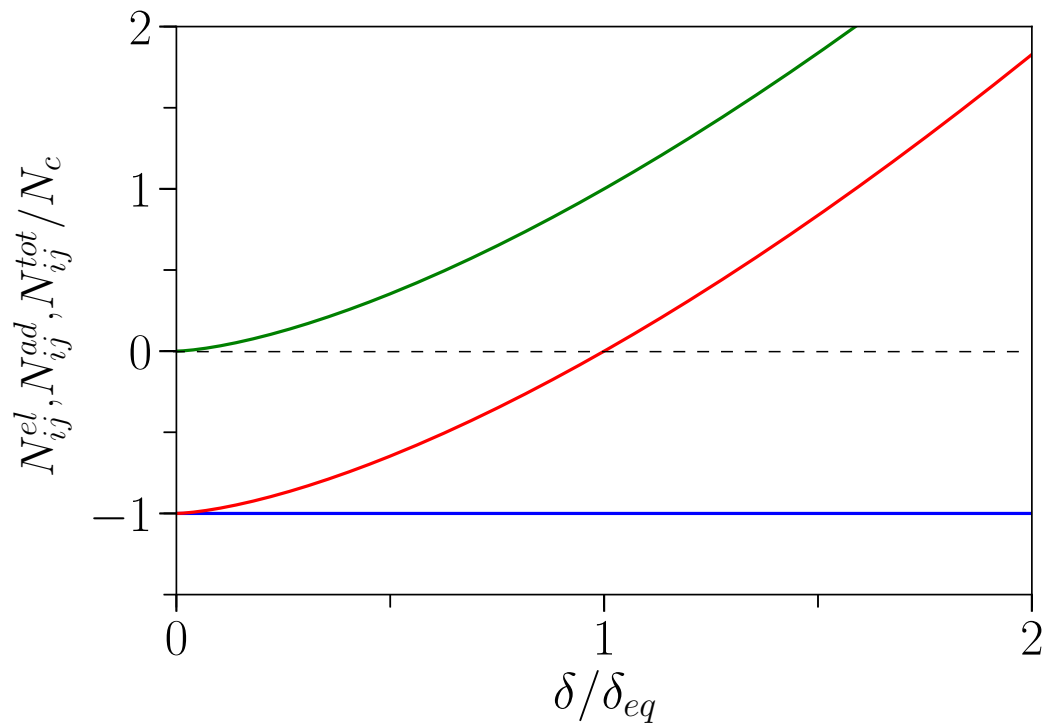

**Fig. S1.** The non-viscous normal contact forces in the Hertzian-DMT model: elastic  $N_{ij}^{el}$  (green), adhesive  $N_{ij}^{ad}$  (blue), and the sum of the two  $N_{ij}^{tot} = N_{ij}^{el} + N_{ij}^{ad}$  (red) normalized by  $N_c$  as a function of the normalized normal overlap ( $\delta/\delta_{eq}$ ). See the text in SI 1 for  $\delta_{eq}$ .

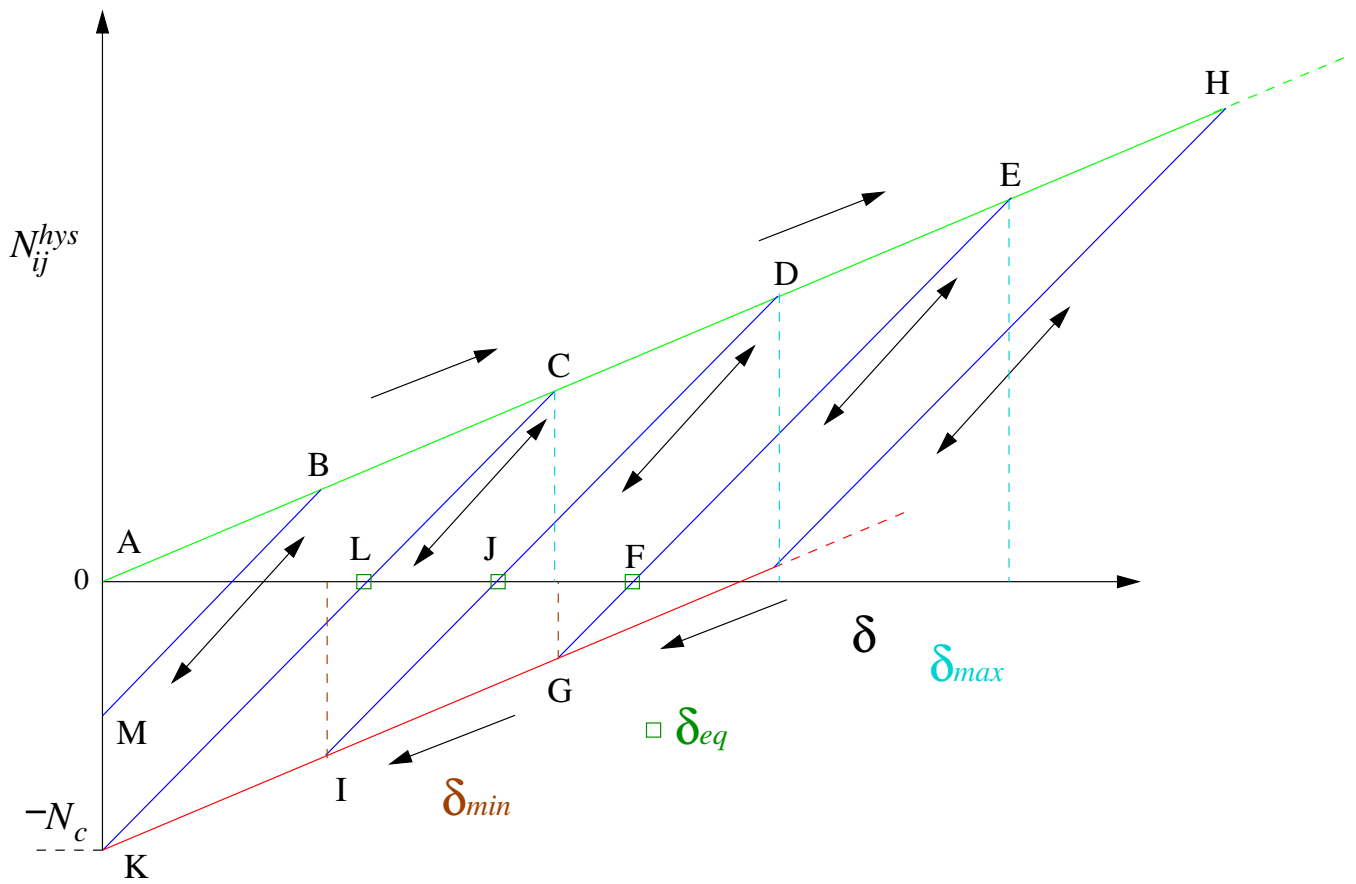

Fig. S2. A sketch of the hysteretic contact model. The arrows show the directions of loading/unloading/reloading. See the text in SI 2.

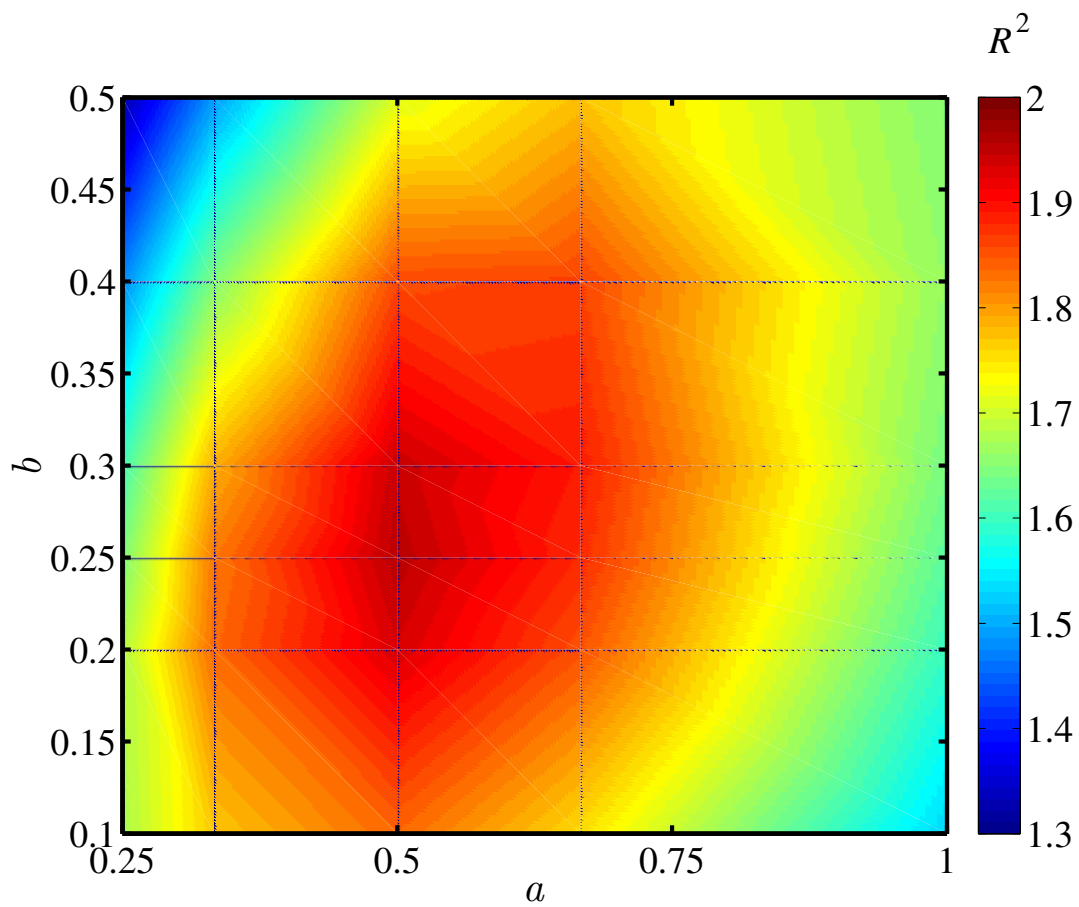

Fig. S3. Variation of the combined  $R^2$  with  $a$  and  $b$ . See Eq. 2 in the main text.

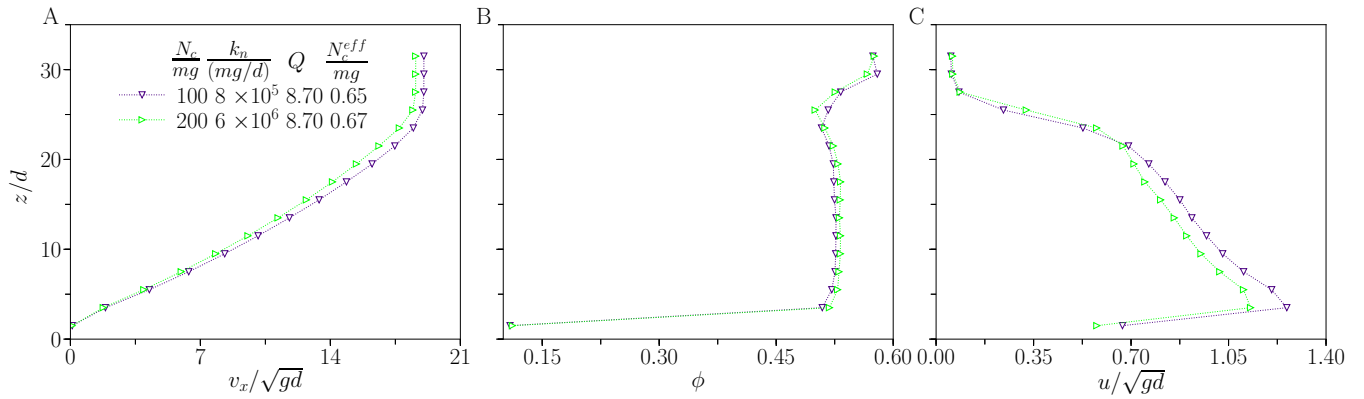

**Fig. S4.** (A) Velocity ( $v_x(z)$ ), (B) volume fraction ( $\phi(z)$ ), and (C) r.m.s. velocity ( $u(z)$ ) profiles for a similar value of  $N_c^{eff}$  but different  $N_c$ ,  $k_n$ , and  $Q$ .

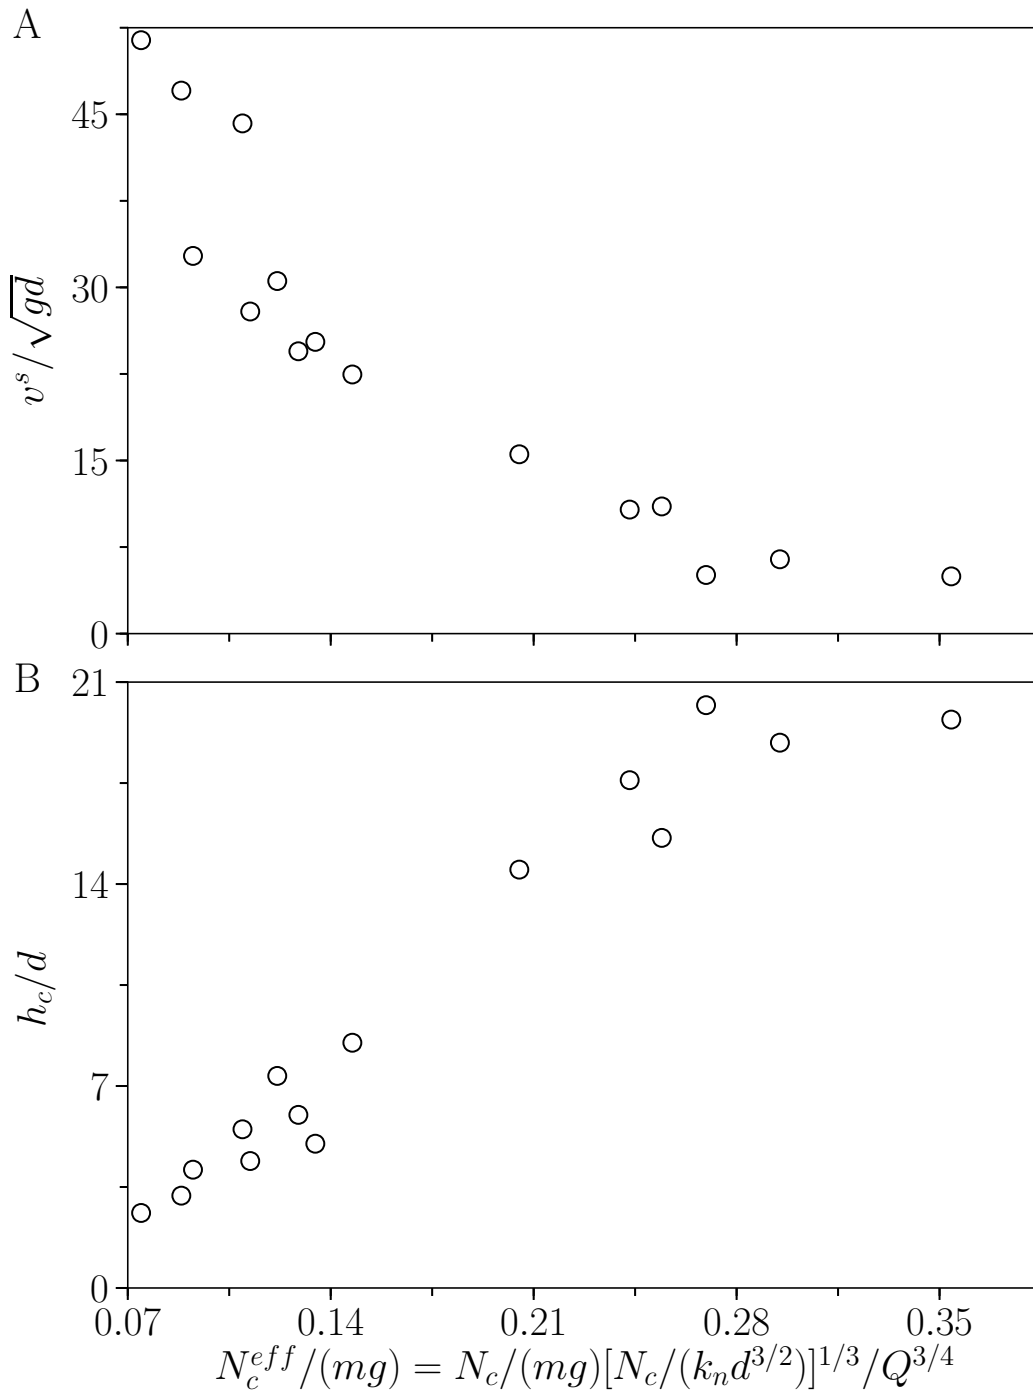

**Fig. S5.** Evidence of the 'dynamic' effective adhesive force for the Hertzian-DMT model. (A) Variation of the free surface velocity ( $v^s / (gd)^{1/2}$ ) and (B) the thickness of the plug ( $h_c / d$ ) with the dynamic 'effective' adhesive force  $N_c^{eff}$  at  $\theta = 29^\circ$  for different  $N_c / (mg) \in (25, 100)$ ,  $k_n / (mg/d^{3/2}) \in (10^6, 10^7)$ , and  $Q \in (9.5, 22.0)$ .

56 **SI 7: Evidence of the sensitivity of the bulk cohesion to the material parameters for the hysteretic Hookean-DMT model.** The  
57 simulations are carried out at a fixed inclination angle  $\theta = 22^\circ$  using the hysteretic Hookean-DMT model. The simulation  
58 methodology is the same as in the main text, except that the flow is restricted in the  $xz$  plane (2D simulations), just for the  
59 sake of reducing the computational cost. Fig. S6 shows the effect of the inter-particle adhesion  $N_c$  and stiffness  $k_n$  on the steady  
60 velocity profile. The same behavior of the velocity profile is noticed with increasing  $N_c$  and  $k_n$  as using the non-hysteretic  
61 models. The effect of the dissipation through the quality factor  $Q$  on the velocity profile is not so obvious, as mentioned above,  
62 hence, is not shown.

63 **SI 8: The fitting of the rheological data using the empirical function proposed by Berger *et al.* (Ref. 27).** Berger *et al.* showed  
64 that the effective friction  $\mu$  comprises two parts: (i) a purely frictional part, which is a function of the inertial number  $I$  and  
65 (ii) a purely cohesive part, which is a function of both  $I$  and the cohesion number  $C$ . They proposed an empirical function to  
66 describe their observations. The function in our case reads as

$$67 \quad \mu(C^{eff}, I) = \mu(0, I) + \frac{1.31C^{eff}}{1 - \beta \ln(1 - I/(1 + \alpha C^{eff})^{1/2})}, \quad [5]$$

68 where  $\mu(0, I) = \mu_s + (\mu_m - \mu_s)/(1 + I_0/I)$  with  $\mu_s$ ,  $\mu_m$ , and  $I_0$  be the fitting parameters, and  $\beta$  and  $\alpha$  are also the fitting  
69 parameters. Fig. S7 shows the  $\mu(I)$  data (symbols) for different values of  $C^{eff}$  (the data for  $C^{eff} > 0.09$  have a few points,  
70 hence, are not considered) along with the fits (solid lines) of Eq. 5, taking  $\mu_s = 0.37$ ,  $\mu_m = 0.76$ ,  $I_0 = 0.34$ ,  $\beta = 4.0$ , and  
71  $\alpha = 0.1$ . Note that  $\mu_s = 0.36$ ,  $\mu_m = 0.75$ , and  $I_0 = 0.37$  for the cohesionless case ( $C^{eff} = 0$ ) are slightly different. The equation  
72 captures the variation of  $\mu$  with  $I$  and  $C^{eff}$  well for high  $I$ . However, it fails to capture the invariant behavior of  $\mu(I)$  at low  $I$   
73 for high  $C^{eff}$ .

74 **SI 9: Binary collision between cohesive grains.** We consider a collision between two cohesive grains with a relative impact  
75 velocity  $v_{init}$ . The time evolution of the interpenetration  $\delta$  for the Hookean-JKR model is given by the following dimensionless  
76 equation:

$$77 \quad \frac{d^2 \tilde{\delta}}{d\tilde{t}^2} = - \left( 2\tilde{\delta} + \frac{1}{Q} \frac{d\tilde{\delta}}{d\tilde{t}} \right) + 2\sqrt{\tilde{\delta}}, \quad [6]$$

78 where  $\tilde{\delta} = \delta/\delta_{eq}$  and  $\tilde{t} = t\sqrt{k_n/m}$ . The above equation for the Hertzian-DMT model reads as

$$79 \quad \frac{d^2 \tilde{\delta}}{d\tilde{t}^2} = -\tilde{\delta}^{1/2} \left( 2\tilde{\delta} + \frac{\sqrt{3}}{Q} \frac{d\tilde{\delta}}{d\tilde{t}} \right) + 2, \quad [7]$$

80 where  $\tilde{\delta} = \delta/\delta_{eq}$  and  $\tilde{t} = t\sqrt{k_n/m} (N_c/k_n)^{1/6}$ . In both cases, one can show from the above equations that the two grains will  
81 be glued together ( $\tilde{\delta} > 0$ ) after impact if the relative impact velocity  $\tilde{v}_{init}$  is less than a critical value  $\tilde{v}_c$ , i.e.,  $\tilde{v}_{init} < \tilde{v}_c$ . In the  
82 above two equations,  $Q$  is the only parameter, hence,  $\tilde{v}_c$  is a function of  $Q$  only. In the dimensional form,  $v_c = \delta_{eq}\sqrt{k_n/m}F_1(Q)$   
83 for the Hookean-JKR model and  $v_c = \delta_{eq}\sqrt{k_n/m} (N_c/k_n)^{1/6} F_2(Q)$  for the Hertzian-DMT model. The critical relative kinetic  
84 energy is  $E_c = 1/2mv_c^2$ .  $E_c$  for both the models can be given as

$$85 \quad E_c = N_c \delta_{eq} G(Q), \quad [8]$$

86 where  $G(Q)$  is a decreasing function of the quality factor, which depends on the chosen model.

87 **SI 10: Planar shear flow simulations.** We study the plane shear flow of cohesive grains using a normal stress imposed shear cell  
88 in the absence of gravity. The geometry comprises two rough walls composed of randomly glued grains. The top wall is moved  
89 with a constant velocity  $U$  in the  $x$ -direction under an imposed vertical stress  $\sigma_{zz}^{ext}$ , while the bottom one is kept static. The  
90 inter-particle contact forces are computed using the Hookean-JKR model. The top wall movement is governed by the equations  
91 of motion based on the balance between the cumulative vertical force  $\mathbf{F}_{zz}$ , exerted on the wall by the flowing particles and the  
92 external force  $\mathbf{F}_{zz}^{ext} = \sigma_{zz}^{ext} A$ , where  $A = 20d \times 20d$  is the cross-sectional area of the wall. The shear rate is varied by changing  
93  $U$ . The results are obtained at steady state (reached when  $\mathbf{F}_{zz}^{ext} = \mathbf{F}_{zz}$ ) over a strain window of 4 and are made dimensionless  
94 using  $d$  as the length scale,  $(m/\sigma_{zz}^{ext}d)^{1/2}$  as the time scale, and  $\sigma_{zz}^{ext}d^2$  as the force scale. Two different sets of parameters ( $N_c$ ,  
95  $k_n$ ,  $Q$ ) yielding the same  $C^{eff}$  are considered. The computations of  $N_c^{eff}$ ,  $C^{eff}$ ,  $I$ ,  $\mu$ , and  $\phi$  are the same as described in the  
96 main text. Fig. S8 shows the variation of  $\mu$  and  $\phi$  with  $I$  for the two sets; each cluster of points corresponds to a different shear  
97 rate at a given  $U$ . The combined data for the same  $C^{eff}$  from the inclined plane is also included for comparison. The data of  
98  $\mu$  and  $\phi$  for the two sets collapse well on each other over the considered range of inertial number. Moreover, the data obtained  
99 in the shear cell match reasonably well (the difference is less than 5%) with that in the inclined plane. These results again  
100 validate our model.



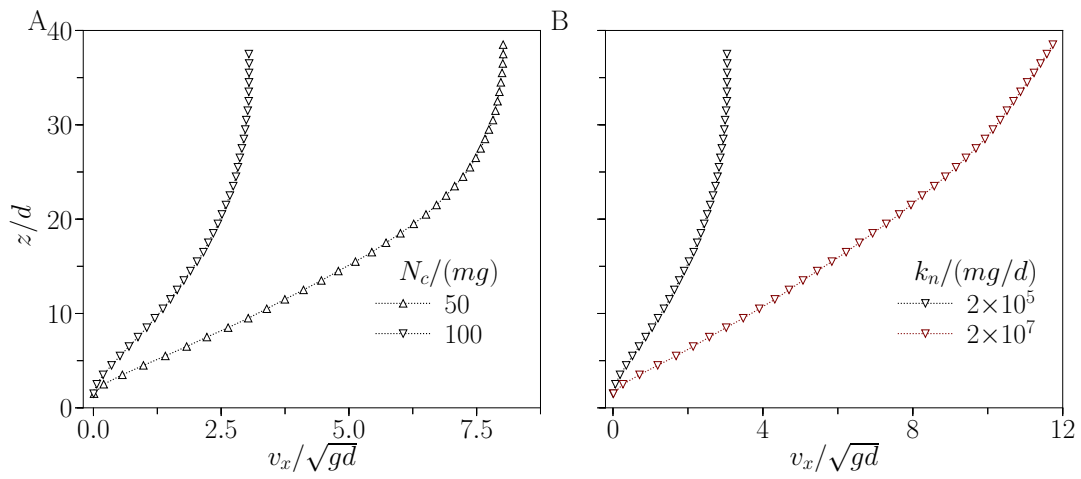

**Fig. S6.** Effects of particle properties on the flow for the hysteretic Hookean-DMT model. Steady velocity profiles ( $v_x(z)$ ) at  $\theta = 22^\circ$  for various (A) inter-particle adhesion ( $N_c$ ) keeping  $k_n/(mg/d) = 2 \times 10^5$  and  $Q = 0.94$  fixed and (B) particle stiffness ( $k_n$ ) keeping  $N_c/(mg) = 100$  and  $Q = 0.94$  fixed.  $k'_n = 2k_n$  in both cases.

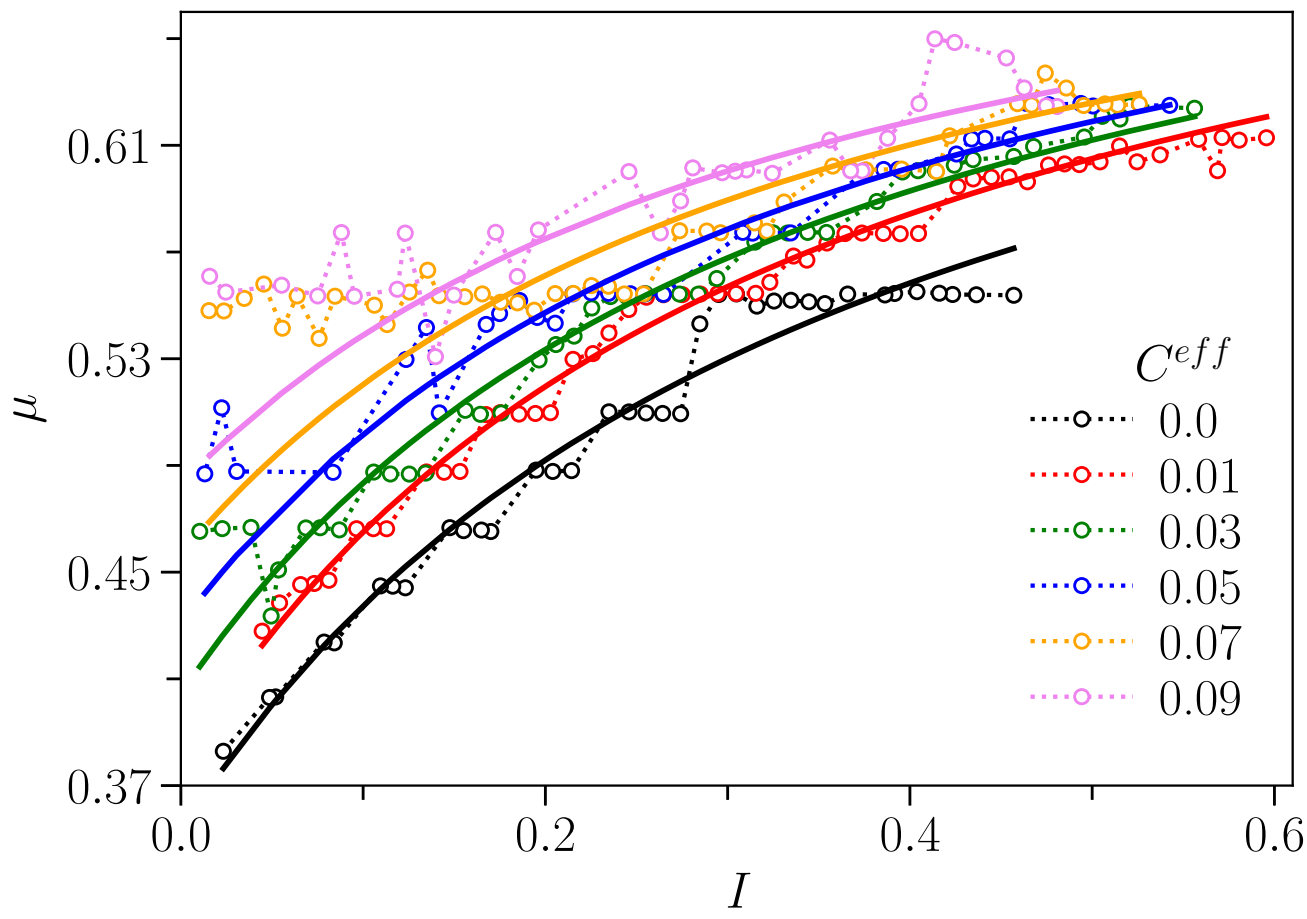

Fig. S7. Fitting of  $\mu(I, C^{eff})$  using the empirical function (Eq. 5). The symbols are the data, and the solid lines, the fits.

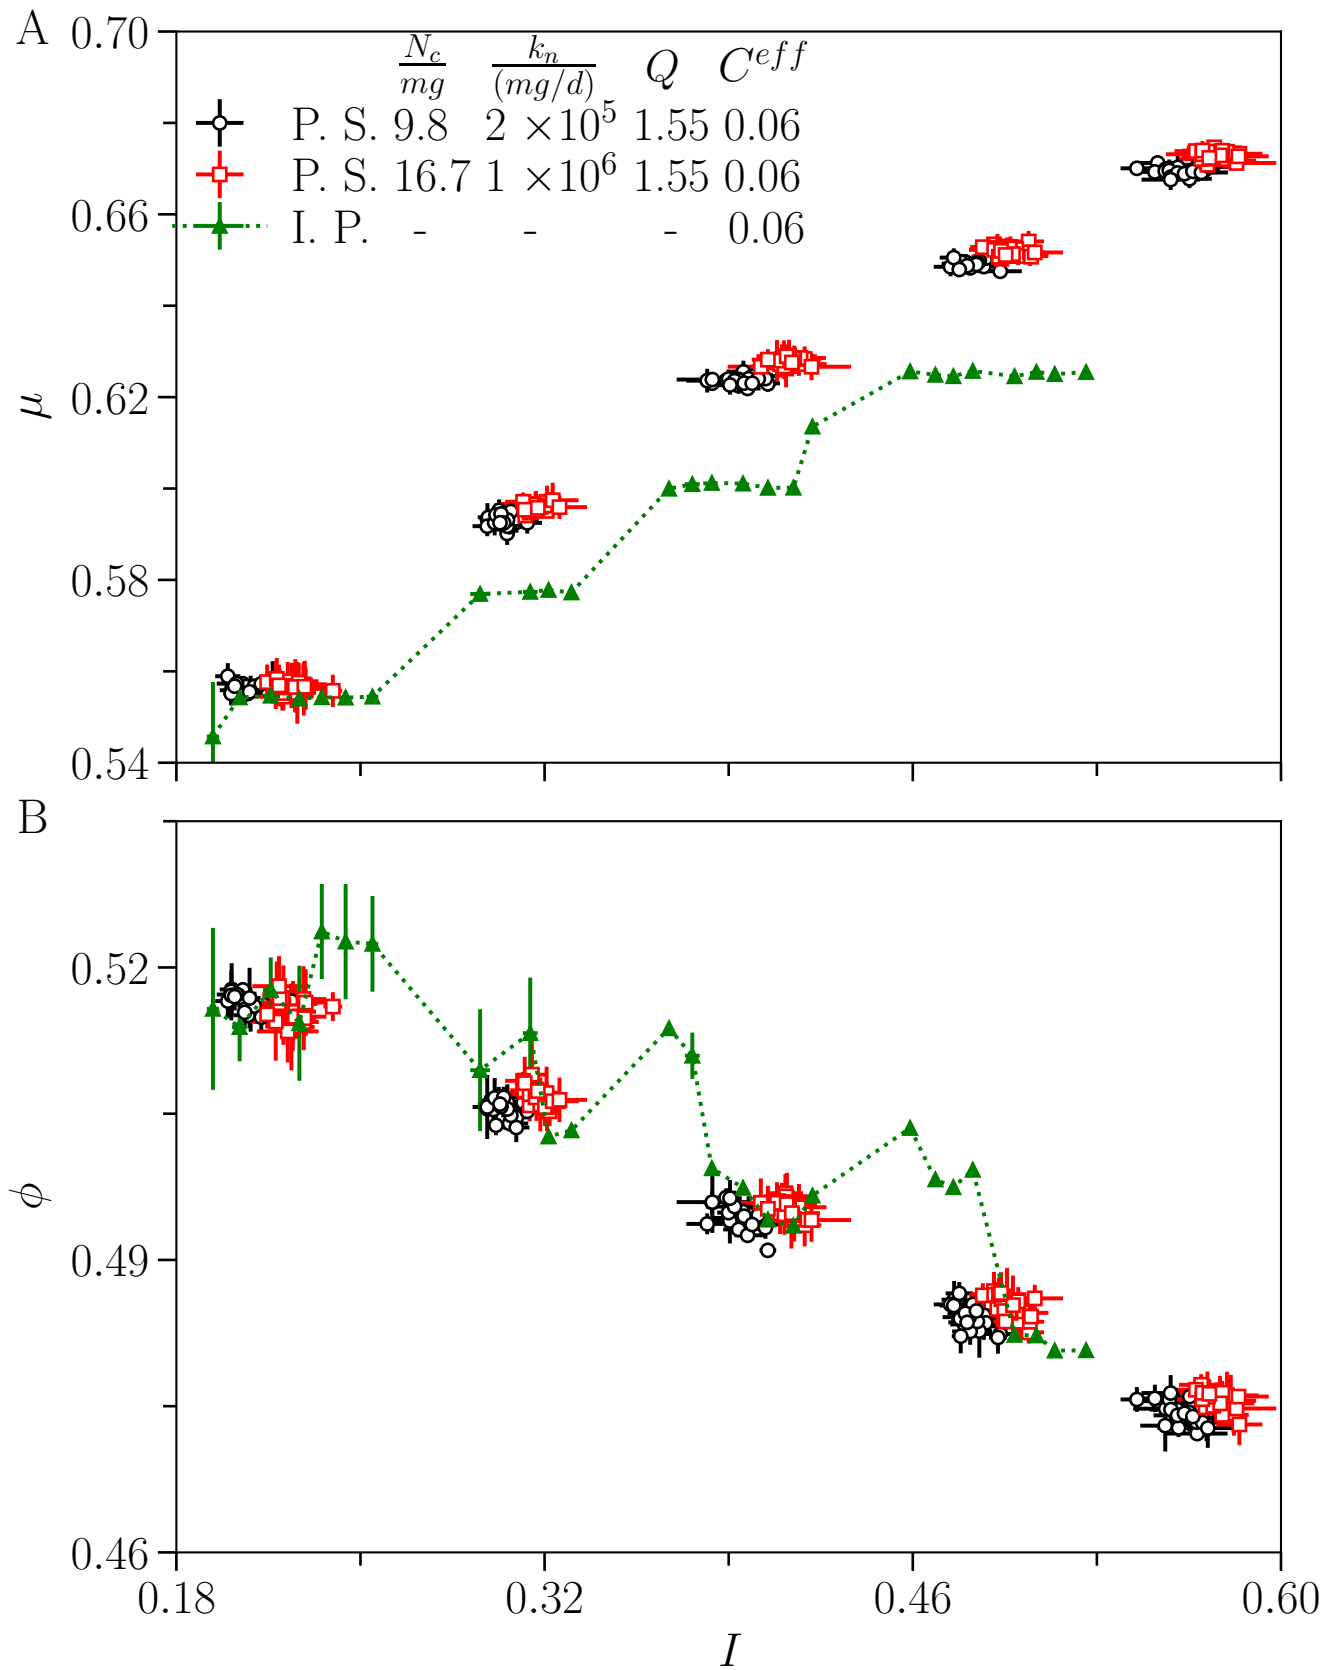

**Fig. S8.** Comparison of the rheological data of plane shear and inclined plane flows. Variation of (A) the effective friction ( $\mu$ ) and (B) the volume fraction ( $\phi$ ) with the inertial number ( $I$ ) for the same value of 'effective' cohesion number ( $C^{eff} = 0.06$ ), resulting from different ( $N_c, k_n, Q$ ).
